# Supplementary material for: Aqueous phase reforming of glycerol to 1,2-propanediol over Pt-nanoparticles supported on hydrotalcite in the absence of hydrogen
Source: Royal Society of Chemistry journal article supplement (doi:10.1039/c2gc36019e), 2012-01-01
Supplement: c2gc36019e.pdf [file c2gc36019e.pdf]

## Supporting information for

### Aqueous phase reforming of glycerol to 1, 2-propanediol over Pt-nanoparticles supported Hydrotalcite in absence of hydrogen<sup>†</sup>

Chandrashekar Pendem<sup>a</sup>, Piyush Gupta<sup>a</sup>, Nisha Chaudhary<sup>a</sup>, Sarbjit Singh<sup>a</sup>, Jagdish Kumar<sup>a</sup>, Takehiko Sasaki<sup>b</sup>, Arunabha Datta<sup>\*a,c</sup>, Rajaram Bal <sup>\*a</sup>

<sup>a</sup> Indian Institute of Petroleum, Dehra Dun 248 005, India; <sup>b</sup> Department of Complexity, University of Tokyo

<sup>c</sup> Present address: Professor and Head, Centre for Applied Chemistry, Central University of Jharkhand, Ranchi 835205, Jharkhand

\*Corresponding author. Tel.: +91 135 2525797; Fax: +91 135 2660202

E-mail addresses: [raja@iip.res.in](mailto:raja@iip.res.in), [adatta@iip.res.in](mailto:adatta@iip.res.in)

Fig. S1

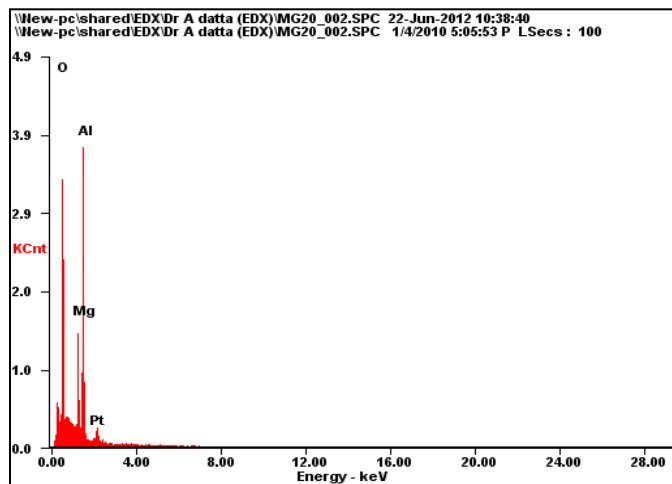

Figure S1: Energy-dispersive X-ray spectroscopy (EDX) of Pt-HT catalyst.

Fig. S2

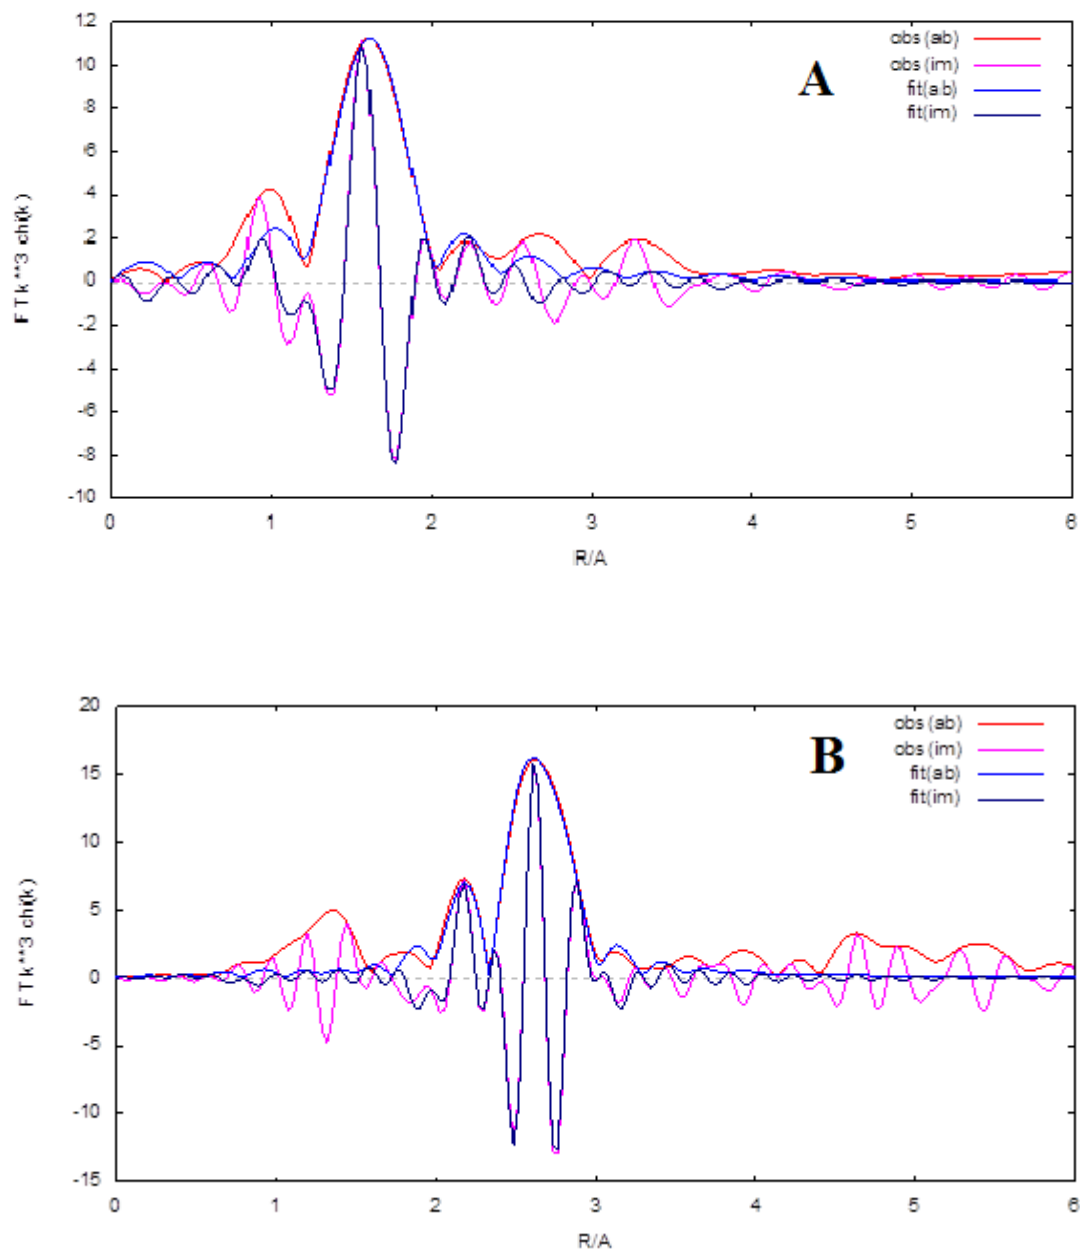

Figure S2: Pt LIII-edge EXAFS spectra of Pt-HT (**A**) Fresh catalyst, (**B**) spent catalyst

Fig. S3

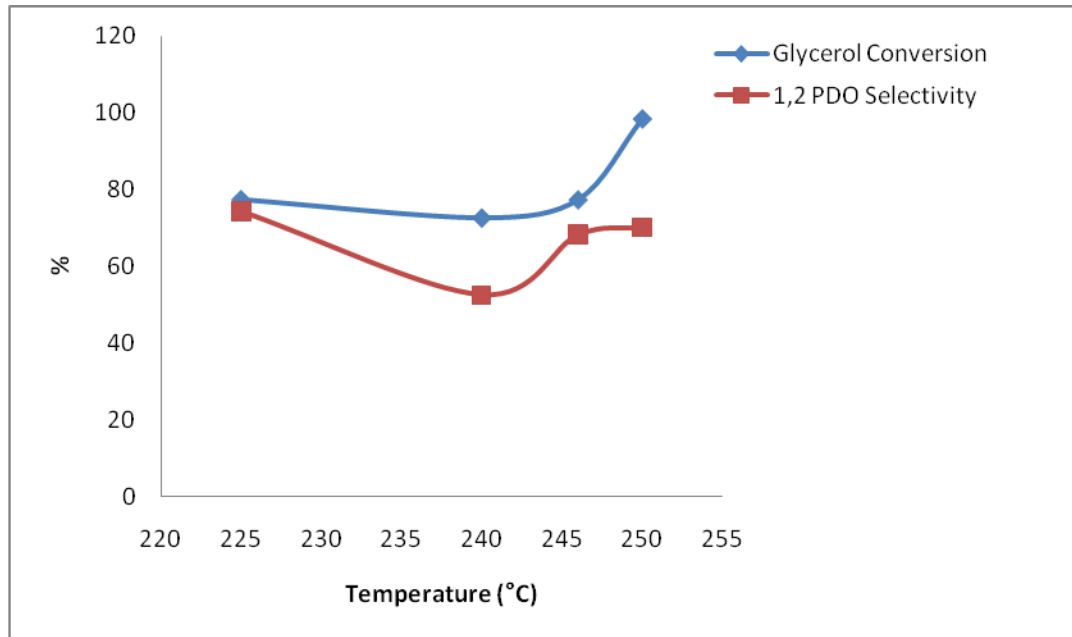

Figure S3: Effect of reaction temperature on Aqueous Phase Reforming of Glycerol for glycerol conversion and 1,2 Propanediol selectivity.

Fig. S4

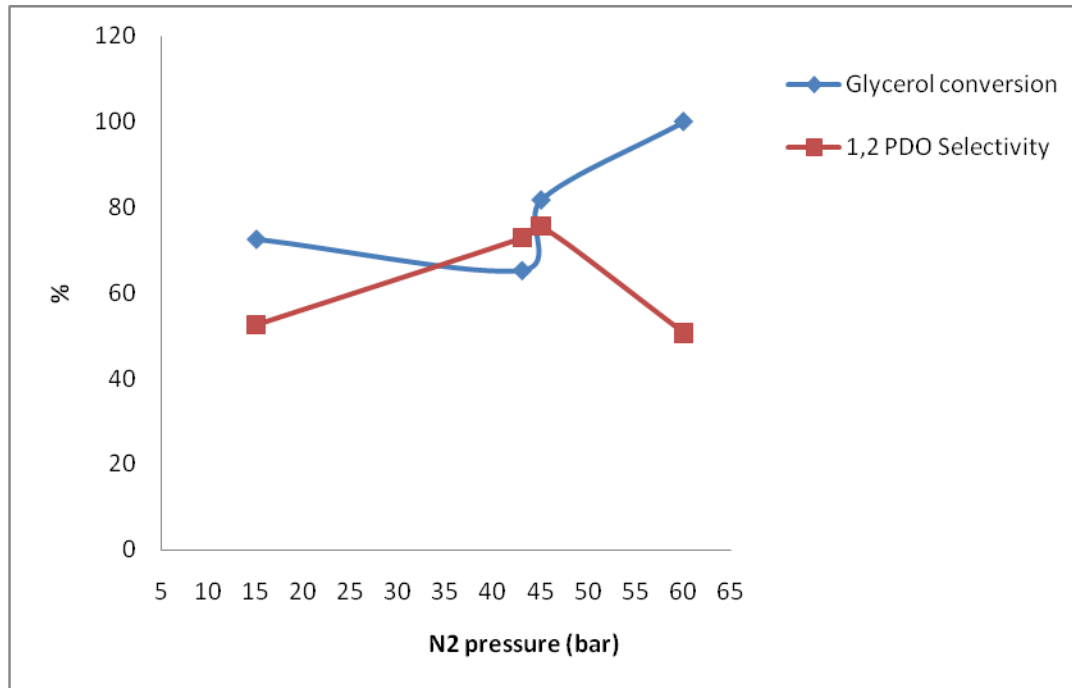

Figure S4: Effect of reaction pressure on Aqueous Phase Reforming of Glycerol for glycerol conversion and 1,2 Propanediol selectivity.

Table S1: Activity of Pt-HT at different calcination temperatures for APR of glycerol<sup>a</sup>.

| Entry                 | Glycerol<br>Conv.<br>(%) | Liquid products Selectivity (%) |          |         |        |        | Gas products Selectivity (%) |                |                 |        |
|-----------------------|--------------------------|---------------------------------|----------|---------|--------|--------|------------------------------|----------------|-----------------|--------|
|                       |                          | EtOH                            | 2-Pr nol | 1-Prnol | Acetol | 1,2 PD | EG                           | H <sub>2</sub> | CO <sub>2</sub> | Alkane |
| <b>1</b> <sup>b</sup> | 98.4                     | 1.5                             | 8.3      | 3.4     | 4.9    | 74.1   | 7.8                          | 75.0           | 23.4            | 1.6    |
| <b>2</b> <sup>c</sup> | 94.7                     | 1.3                             | 9.6      | 4.7     | 1.3    | 75.5   | 7.6                          | 74.4           | 24.4            | 1.2    |

<sup>a</sup> 2 g glycerol in 20 ml water, 45 bar N<sub>2</sub>, 250 °C, catalyst wt. = 0.2 g (Pt was loaded on HT followed by calcination), reaction time = 3h., Al<sub>2</sub>O<sub>3</sub>: MgO = 80:20. <sup>b</sup> calcined at 260°C <sup>c</sup> calcined at 450°C.

Table S2: Effect of time in aqueous phase reforming of glycerol over Pt-HT.

| Reaction Time | Glycerol Conversion (%) | Liquid products Selectivity (%) |        |        |        |        |     | Gas products Selectivity (%) |                 |         |
|---------------|-------------------------|---------------------------------|--------|--------|--------|--------|-----|------------------------------|-----------------|---------|
|               |                         | EtOH                            | 2-Prol | 1-Prol | Acetol | 1,2 PD | EG  | H <sub>2</sub>               | CO <sub>2</sub> | Alkanes |
| 1h            | 69.5                    | -                               | 11.8   | 2.1    | 8.3    | 71.4   | 6.4 | 64.7                         | 30.7            | 4.6     |
| 2 h           | 79.1                    | 2.1                             | 16.3   | 3.1    | 7.9    | 64.7   | 5.9 | 70.1                         | 26.8            | 3.1     |
| 3h            | 89.6                    | 1.9                             | 13.6   | 6.1    | 4.7    | 68.7   | 5.0 | 87.6                         | 11.2            | 1.2     |
| 4h            | 100                     | 1.6                             | 17.8   | 7.2    | 5.8    | 63.7   | 3.9 | 48.7                         | 45.9            | 5.4     |

2 g glycerol in 20 ml water; catalyst wt. = 0.2 g, 45 bar N<sub>2</sub>, Temp. = 250°C
